# Supplementary material for: Hydrogen bonding versus π-stacking in ferromagnetic interactions. Studies on a copper triazolopyridine complex
Source: Royal Society of Chemistry journal article supplement (doi:10.1039/c2ce26654g), 2013-01-01

# Hydrogen bonding *versus* $\pi$ -stacking in ferromagnetic interactions. Studies on a copper triazolopyridine complex

Carmen Ramírez de Arellano<sup>a\*</sup>, Emilio Escrivà<sup>b</sup>, Carlos J. Gómez-García<sup>c</sup>, Guillermo Mínguez Espallargas<sup>c</sup>, Rafael Ballesteros<sup>a</sup> and Belén Abarca<sup>a</sup>

<sup>a</sup>Departament de Química Orgànica, Universitat de València, c/ Vicent Andrés Estellés, s/n, 46100 Burjassot (València) Spain.

<sup>b</sup>Departament de Química Orgànica, Universitat de València, c/ Vicent Andrés Estellés, s/n, 46100 Burjassot (València) Spain.

<sup>c</sup>Instituto de Ciencia Molecular (ICMol), Parque Científico, Universidad de Valencia, C/Catedrático José Beltrán, 2, 46980 Paterna, Valencia, Spain

## Supplementary information

Table 1. Hydrogen bonds for [Cu(BTP)(H<sub>2</sub>O)<sub>2</sub>(BF<sub>4</sub>)](BF<sub>4</sub>)·2H<sub>2</sub>O [Å and °].

| D-H...A                                                                                                     | d(D-H)  | d(H...A) | d(D...A)  | <(DHA) |
|-------------------------------------------------------------------------------------------------------------|---------|----------|-----------|--------|
| 1. Interactions within linear chains formed through OH <sub>2</sub> ...F <sub>4</sub> B                     |         |          |           |        |
| O(2)-H(04)...F(8')#3                                                                                        | 0.68(3) | 2.23(3)  | 2.887(17) | 162(6) |
| O(2)-H(04)...F(6')#3                                                                                        | 0.68(3) | 2.38(4)  | 2.967(8)  | 145(6) |
| O(2)-H(04)...F(8)#3                                                                                         | 0.68(3) | 2.58(4)  | 3.144(13) | 143(6) |
| O(2)-H(04)...F(6)#3                                                                                         | 0.68(3) | 2.64(3)  | 3.288(12) | 160(6) |
| 2. Other interactions involved in the 3-D network                                                           |         |          |           |        |
| 2.1 Interactions of the coordinated water molecule (O1) with non coordinating water molecules (O98 and O99) |         |          |           |        |
| O(1)-H(01)...O(99)                                                                                          | 0.72(2) | 1.92(2)  | 2.641(4)  | 179(4) |
| O(1)-H(02)...O(98)#1                                                                                        | 0.69(3) | 1.96(3)  | 2.632(4)  | 163(6) |
| 2.2 Interaction of the coordinated water molecule (O2) with BF <sub>4</sub> <sup>-</sup> anion              |         |          |           |        |
| O(2)-H(03)...F(1)#2                                                                                         | 0.70(3) | 2.16(3)  | 2.838(5)  | 165(5) |
| O(2)-H(03)...F(1')#2                                                                                        | 0.70(3) | 2.16(3)  | 2.776(6)  | 148(5) |
| 2.3 Interactions of crystallization water molecules (O98 and O99) with BF <sub>4</sub> <sup>-</sup> anions  |         |          |           |        |
| O(98)-H(06)...F(7)                                                                                          | 0.86(3) | 1.95(3)  | 2.760(5)  | 156(4) |
| O(98)-H(06)...F(5)                                                                                          | 0.86(3) | 3.24(4)  | 3.948(14) | 142(4) |
| O(99)-H(07)...F(6)                                                                                          | 0.83(2) | 1.94(3)  | 2.747(12) | 164(4) |
| O(99)-H(07)...F(8')                                                                                         | 0.83(2) | 1.99(3)  | 2.778(16) | 158(4) |
| O(99)-H(08)...F(2')#4                                                                                       | 0.85(3) | 1.97(3)  | 2.804(6)  | 167(4) |
| O(99)-H(08)...F(4)#4                                                                                        | 0.85(3) | 2.14(3)  | 2.841(6)  | 140(4) |
| O(99)-H(08)...F(3)#4                                                                                        | 0.85(3) | 2.27(3)  | 3.040(6)  | 151(4) |

Symmetry transformations used to generate equivalent atoms: #1  $x+1/2, -y+1/2, z-1/2$ ; #2  $x, y, z-1$ ; #3  $x-1/2, -y+1/2, z-1/2$ ; #4  $-x+2, -y, -z+1$ .

Figure 1. Ellipsoids plot (50% probability level) for  $[\text{Cu}(\text{BTP})(\text{H}_2\text{O})_2(\text{BF}_4)](\text{BF}_4) \cdot 2\text{H}_2\text{O}$ .

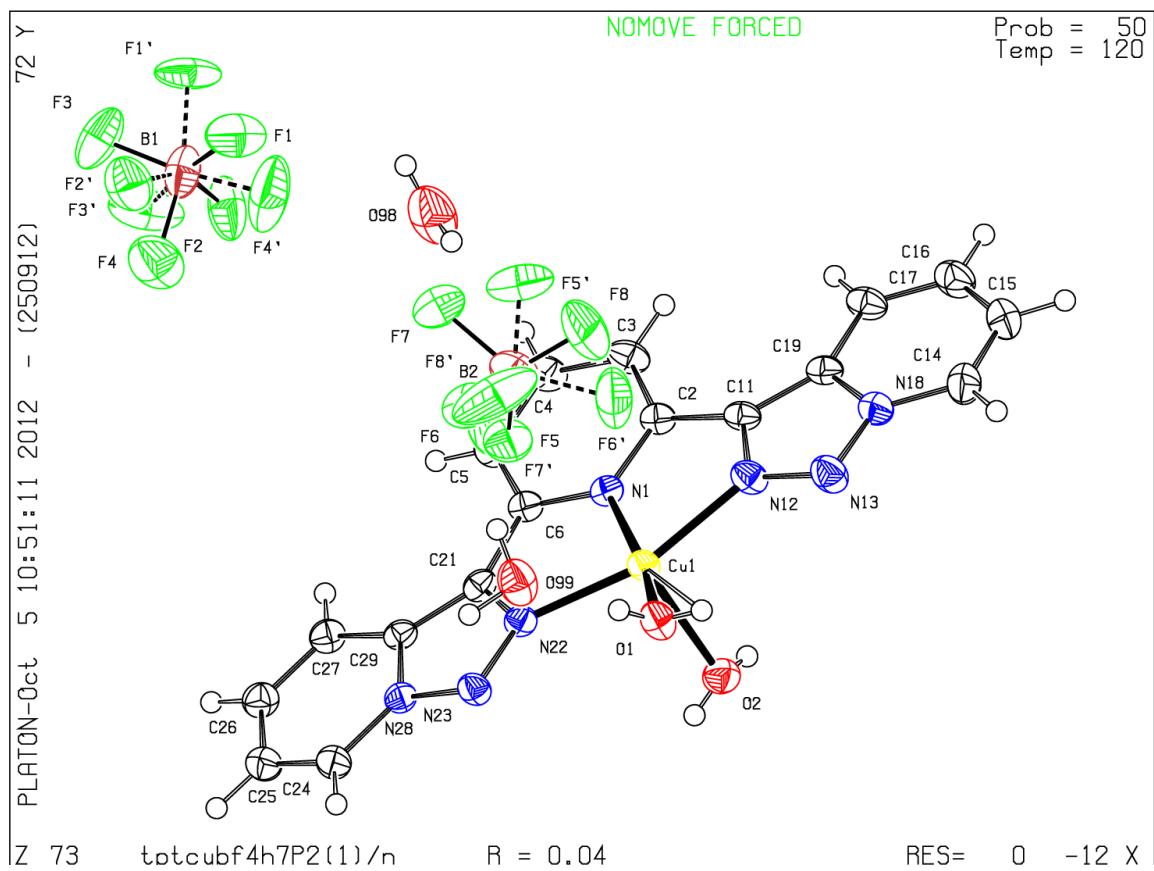

Supplement: c2ce26654g.pdf [file c2ce26654g.pdf]
